# Supplementary material for: Improvement of Fresh Ovine “Tuma” Cheese Quality Characteristics by Application of Oregano Essential Oils
Source: MDPI journal article supplement (doi:10.3390/antiox12061293), 2023-06-17
Supplement: s1 [file s1]

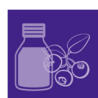

# Improvement of Fresh Ovine “Tuma” Cheese Quality Characteristics by Application of Oregano Essential Oils

Giuliana Garofalo <sup>1</sup>, Marialetizia Ponte <sup>1</sup>, Carlo Greco <sup>2</sup>, Marcella Barbera <sup>3</sup>, Michele Massimo Mammano <sup>2</sup>, Giancarlo Fascella <sup>2</sup>, Giuseppe Greco <sup>1,2</sup>, Giulia Salsi <sup>2</sup>, Santo Orlando <sup>1</sup>, Antonio Alfonzo <sup>1</sup>, Antonino Di Grigoli <sup>1</sup>, Daniela Piazzese <sup>3</sup>, Adriana Bonanno <sup>1</sup>, Luca Settanni <sup>1</sup> and Raimondo Gaglio <sup>1,\*</sup>

<sup>1</sup> Department of Agricultural, Food and Forest Sciences, University of Palermo, 90128 Palermo, Italy; giuliana.garofalo01@unipa.it (G.G.); marialetizia.ponte@unipa.it (M.P.); giuseppe.greco@crea.gov.it (G.G.); santo.orlando@unipa.it (S.O.); antonio.alfonzo@unipa.it (A.A.); antonino.digrigoli@unipa.it (A.D.G.); adriana.bonanno@unipa.it (A.B.); settanni.luca@unipa.it (L.S.)

<sup>2</sup> Research Centre for Plant Protection and Certification, Council for Agricultural Research and Economics, 90011 Bagheria, Italy; carlo.greco@crea.gov.it (C.G.); massimo.mammano@crea.gov.it (M.M.M.); giancarlo.fascella@crea.gov.it (G.F.); giulia.salsi@crea.gov.it (G.S.)

<sup>3</sup> Department of Earth and Marine Sciences, University of Palermo, 90123 Palermo, Italy; marcella.barbera@unipa.it (M.B.); daniela.piazzese@unipa.it (D.P.)

\* Correspondence: raimondo.gaglio@unipa.it

**Table S1.** Volatile Organic Compounds determined by GC-MS in Tuma Cheeses.

| Identified Chemical Compounds        | R.T. | Samples  |          |          |
|--------------------------------------|------|----------|----------|----------|
|                                      |      | CCP      | ECPO100  | ECPO200  |
| Acids                                |      |          |          |          |
| Acetic acid                          | 14.0 | 5339032  | 978437.3 | 839761.2 |
| Butanoic acid (butyric acid)         | 18.3 | 6201906  | 2041621  | 1802790  |
| Hexanoic acid                        | 22.1 | 10331374 | 2265044  | 2457650  |
| 2-hydroxy-4-methyl-Pentanoic acid    | 23.2 | 5015454  | 1525438  | 824352.7 |
| Octanoic Acid                        | 26.3 | 3443791  | 1186452  | 747310.4 |
| Nonanoic acid                        | 28.3 | 1409874  | 231126.9 | 69338.08 |
| Ketones                              |      |          |          |          |
| 2-pentanone                          | 15.3 | 1178747  | 77042.31 | 53929.62 |
| 3-hydroxy-2-butanone.                | 17.5 | 3829003  | 616338.5 | 916803.5 |
| 2-heptanone                          | 19.9 | 446845.4 | 7704.231 | 23112.69 |
| 2.3 octanedione                      | 21.9 | 1517733  | 508479.2 | 130971.9 |
| 3.5 octadien-2-one                   | 23.4 | 300465   | n.d.     | n.d.     |
| Alcohols                             |      |          |          |          |
| 3-Methyl-1-butanol (Isoamyl alcohol) | 16.3 | 10516275 | 3667214  | 2588622  |
| 1 pentanol                           | 17.1 | 624042.7 | 146380.4 | 92450.77 |
| 2-butanol                            | 13.4 | 2033917  | 300465   | 184901.5 |
| Octan-1-ol                           | 23.9 | 2149480  | 231126.9 | 385211.5 |
| Hydrocarbons                         |      |          |          |          |

|                        |      |          |          |          |
|------------------------|------|----------|----------|----------|
| Hexane-2-methyl        | 14.8 | 1124818  | 77042.31 | n.d.     |
| Heptane 2.4 dimethyl   | 15.2 | 1887537  | 693380.8 | 184901.5 |
| Aldehydes              |      |          |          |          |
| 4 heptenal             | 19.9 | 138676.2 | 15408.46 | n.d.     |
| Hexanal                | 17.9 | 10038613 | 3921454  | 3343636  |
| Heptanal               | 20.0 | 8112555  | 3066284  | 2026213  |
| Nonanal                | 24.5 | 1402170  | 254239.6 | 69338.08 |
| Monoterpenes           |      |          |          |          |
| $\alpha$ -Thujene      | 20.7 | n.d.     | 154084.6 | n.d.     |
| $\alpha$ -Pinene       | 21.1 | n.d.     | 46225.39 | 30816.92 |
| Sabinene               | 24.2 | n.d.     | 38521.15 | 7704.231 |
| $\beta$ -Pinene        | 23.1 | n.d.     | 77042.31 | 7704.231 |
| Myrcene                | 22.1 | n.d.     | 693380.8 | 477662.3 |
| $\alpha$ -Phellandrene | 22.8 | n.d.     | 84746.54 | 61633.85 |
| $\alpha$ -Terpinene    | 23.0 | n.d.     | 693380.8 | 624042.7 |
| p-Cymene               | 22.9 | n.d.     | 785831.6 | 685676.6 |
| Limonene               | 23.2 | n.d.     | 77042.31 | 84746.54 |
| (Z)- $\beta$ -Ocimene  | 22.8 | n.d.     | n.d.     | 161788.8 |
| $\gamma$ -Terpinene    | 23.7 | n.d.     | 824352.7 | 762718.9 |
| Monoterpenoids         |      |          |          |          |
| Linalool               | 24.6 | n.d.     | 77042.31 | 77042.31 |
| Thymol                 | 28.9 | n.d.     | 231126.9 | 154084.6 |
| Carvacrol              | 29.2 | n.d.     | 50909558 | 56310224 |
| Camphor                | 25.9 | n.d.     | n.d.     | 77042.31 |
| Terpinen-4-ol          | 26.7 | n.d.     | 77042.31 | n.d.     |
| $\beta$ -Bisabolene    | 33.9 | n.d.     | n.d.     | 154084.6 |
| $\beta$ -Caryophyllene | 32.3 | n.d.     | 462253.9 | 616338.5 |
| Unknown compounds      |      |          |          |          |
|                        | 25.5 | 594973.6 | 642571.5 | 597591.5 |
|                        | 31.1 | 312304.8 | 287320.4 | 293066.8 |
|                        | 35.7 | 207501.9 | 215802   | 192063.8 |

The results are expressed as peak area obtained from three replicates and include retention time (R.T.) of identified and unidentified compounds. Abbreviations: CCP, control cheese production inoculated with the Milk Starter Cultures (MSC); ECPO100, experimental cheese production inoculated with MSC + 100  $\mu$ L/L of oregano essential oils (OEOs); ECPO200, experimental cheese production inoculated with MSC + 200  $\mu$ L/L of OEOs; n.d., not detectable.
